# Supplementary material
Source: HighWire-hosted journal article supplement (https://rc.rcjournal.com/highwire/filestream/21618/field_highwire_adjunct_files/0/12._PIP_Task_Force_Poster_AARC_FINAL.pdf)
Supplement: 12._PIP_Task_Force_Poster_AARC_FINAL.pdf [file 12._PIP_Task_Force_Poster_AARC_FINAL.pdf]

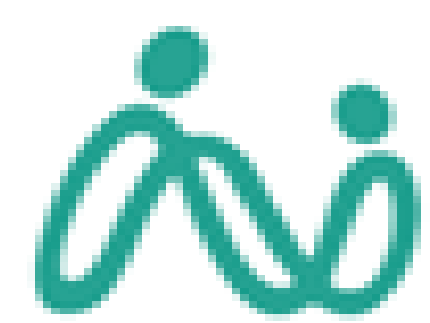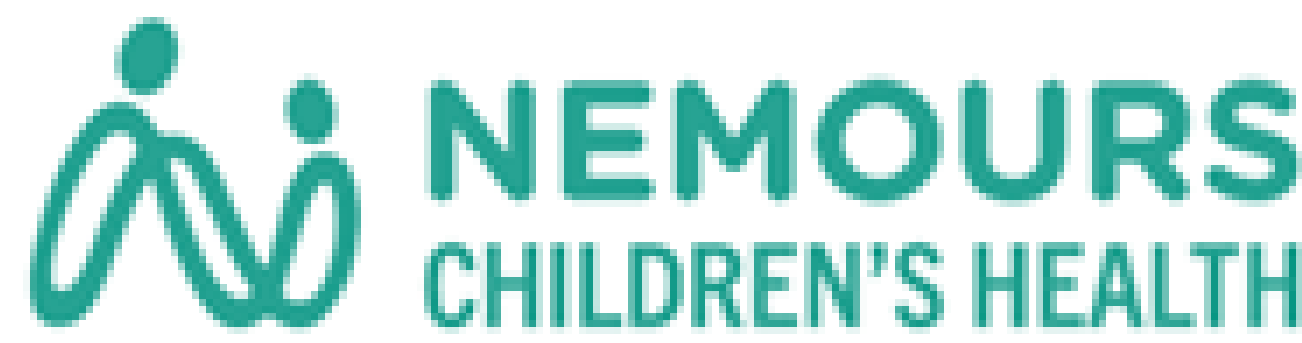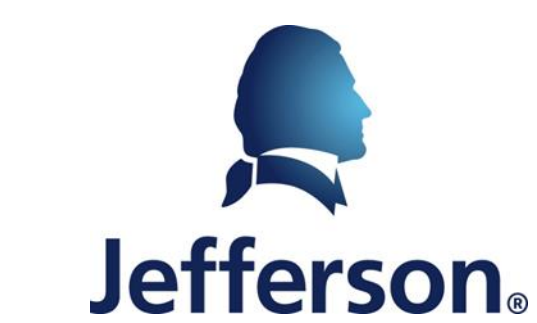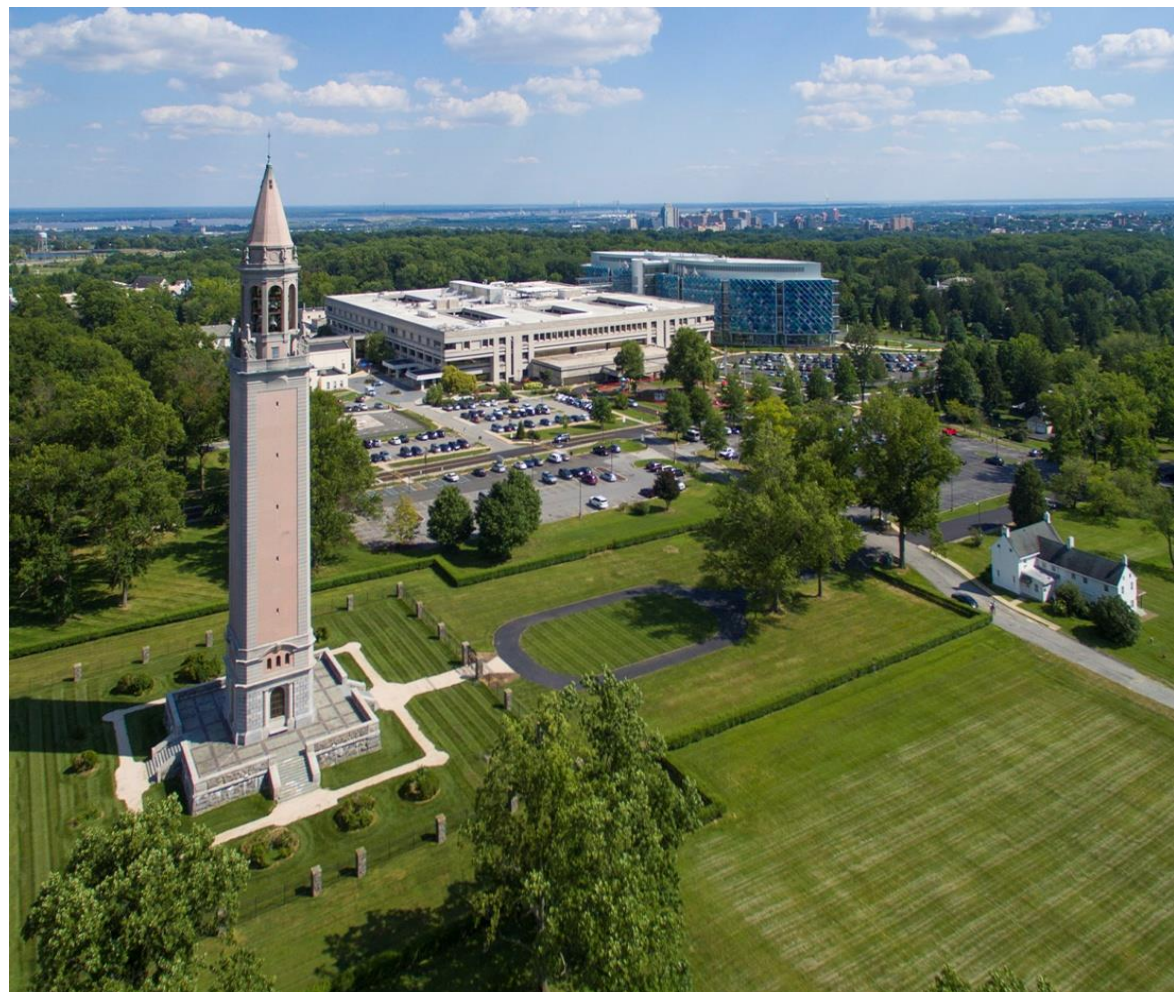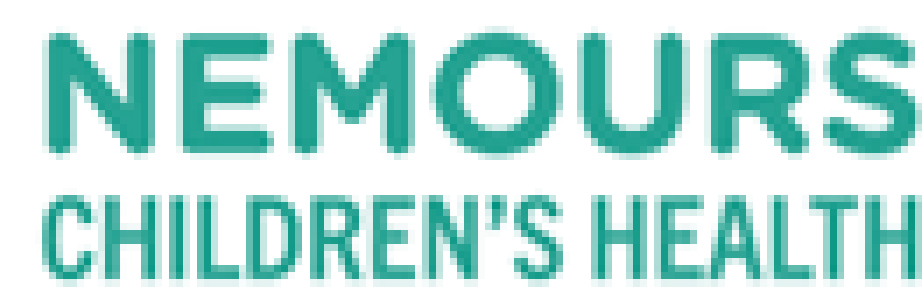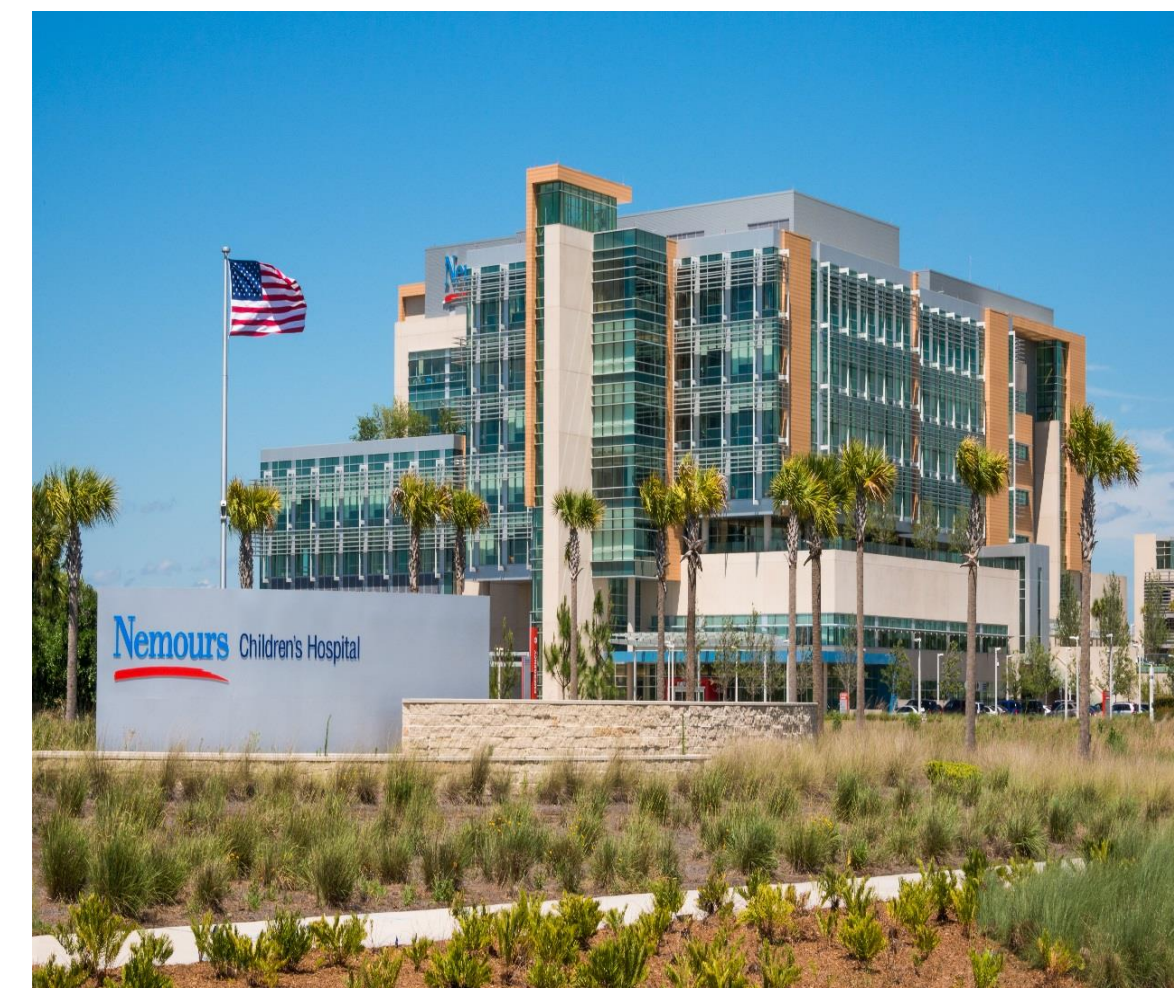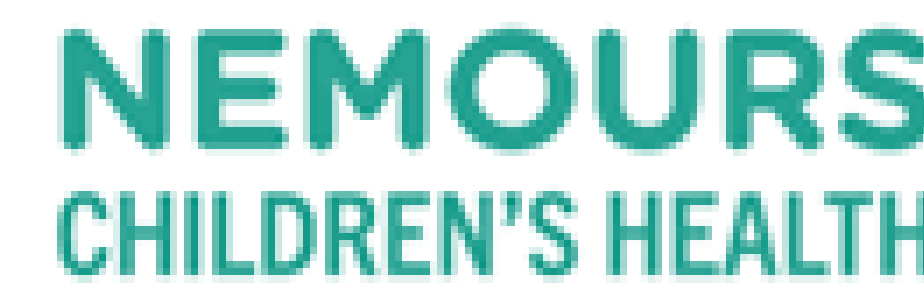

# UTILIZATION OF A PRESSURE INJURY PREVENTION TASK FORCE TO INCREASE REPORTING OF RESPIRATORY DEVICE RELATED PRESSURE INJURIES

**Katlyn L. Burr<sup>1</sup>, Erin Dwyer<sup>2</sup>, Marina Gavidia<sup>1</sup>, Kelly Massa<sup>1</sup>, Kimberly McMahon<sup>1,2</sup>**

<sup>1</sup>Respiratory Care Department and <sup>2</sup>Division of Pediatric Critical Care Medicine, Nemours Children’s Hospital- Delaware, Nemours Children’s Health, Wilmington, DE

Disclosures: Ms. Burr has a relationship with Hill-Rom, as a patient contract trainer, no other authors have relationships to report.

## Original Abstract

### UTILIZATION OF A PRESSURE INJURY PREVENTION TASK FORCE TO INCREASE REPORTING OF RESPIRATORY DEVICE RELATED PRESSURE INJURIES

**Katlyn L Burr RRT-NPS AE-C<sup>1</sup>, Erin Dwyer MSN, APRN, ACCNS-P, CCRN-K<sup>2</sup>, Marina Gavidia RRT-NPS<sup>1</sup>, Kelly Massa RRT-NPS<sup>1</sup>, Kimberly McMahon MD<sup>1,3</sup>**  
Respiratory Care, Nemours Alfred I. duPont Hospital for Children, Wilmington, DE  
Nursing Professional Development Team, Alfred I. duPont Hospital for Children, Wilmington, DE  
Department of Pediatrics, Nemours Alfred I. duPont Hospital for Children, Wilmington, DE

**Background:** Pressure Injuries (PI) occur often in healthcare and cost billions of dollars annually in the U.S. Device-related PIs (DRPI) occur in up to 41% of hospital admissions.<sup>1</sup> Up to 35% of DRPIs are caused by respiratory equipment.<sup>2</sup> In our pediatric institution, we saw numerous respiratory related DRPIs that were not reported but required intervention. We aimed to increase early reporting of respiratory DRPIs.

**Method:** A Pressure Injury Prevention Task Force (PIPTF) was formed in Q3 of 2019. The PIPTF included multi-disciplinary team members including; RNs, RTs, MDs, and Wound Care. The task force utilized existing tools to provide re-education related to pressure injury reporting, prevention and notification. These tools included our NIV Skin Assessment Algorithm (Figure 1) and electronic health record notification for wound care referral and documentation. The PIPTF also reviewed pressure injuries as they were reported in real time in order to offer expert insight and evaluate our processes from a continuous improvement perspective. In an IRB approved, retrospective analysis, from 1/1/2018 to 4/30/2021, we reviewed the incidence and prevalence of respiratory related DRPIs, and initial PI stage to evaluate the effectiveness of our processes and re-education efforts.

**Results:** In 2018, we had 1 reported respiratory related DRPI that was stage 2. In 2019, there were 13 reported respiratory related DRPIs, 61.5% of these reported injuries occurred in Q3 and Q4 of 2019 which coincides with the PIPTF re-education efforts. In 2019, the number of reported respiratory related DRPIs in 2020 increased to 26 (66% increase when compared to 2019). In 2021 (1/1-4/30), there has been 1 reported respiratory related DRPI. A reduction in unstageable pressure injuries was also noted when comparing 2019 to 2020/2021. Contributing device and PI stage information for reported events is included in Table 1.

**Conclusion:** A multi-disciplinary PIPTF can influence pressure injury prevention. While an increase in reportable DRPIs is not ideal on the surface, many of these injuries would have been unreported previously. The reduction in unstageable DRPIs could align with earlier detection of PIs and will be explored. Further studies must be done to evaluate the effectiveness of this model in other patient populations.

#### References:

Barakat-Johnson, Michelle et al. “The incidence and prevalence of medical device-related pressure ulcers in intensive care: a systematic review.” *Journal of wound care* vol. 28,8 (2019): 512-521. doi:10.12968/jowc.2019.28.8.512  
Kayser, Susan A et al. “Prevalence and Analysis of Medical Device-Related Pressure Injuries: Results from the International Pressure Ulcer Prevalence Survey.” *Advances in skin & wound care* vol. 31,6 (2018): 276-285.

**METHOD:**A Pressure Injury Prevention Task Force (PIPTF) was formed in Q3 of 2019. The PIPTF included multi-disciplinary team members including; RNs, RTs, MDs, and Wound Care. The task force utilized existing tools to provide re-education related to pressure injury reporting, prevention and notification. These tools included our NIV Skin Assessment Algorithm (Figure 1) and electronic health record notification for wound care referral and documentation. The PIPTF also reviewed pressure injuries as they were reported in real time in order to offer expert insight and evaluate our processes from a continuous improvement perspective. In an IRB approved, retrospective analysis, from 1/1/2018 to 4/30/2021, we reviewed the incidence and prevalence of respiratory related DRPIs, and initial PI stage to evaluate the effectiveness of our processes and re-education efforts.

## Graph 1

Pressure Injury Occurrence by Contributing Respiratory Device

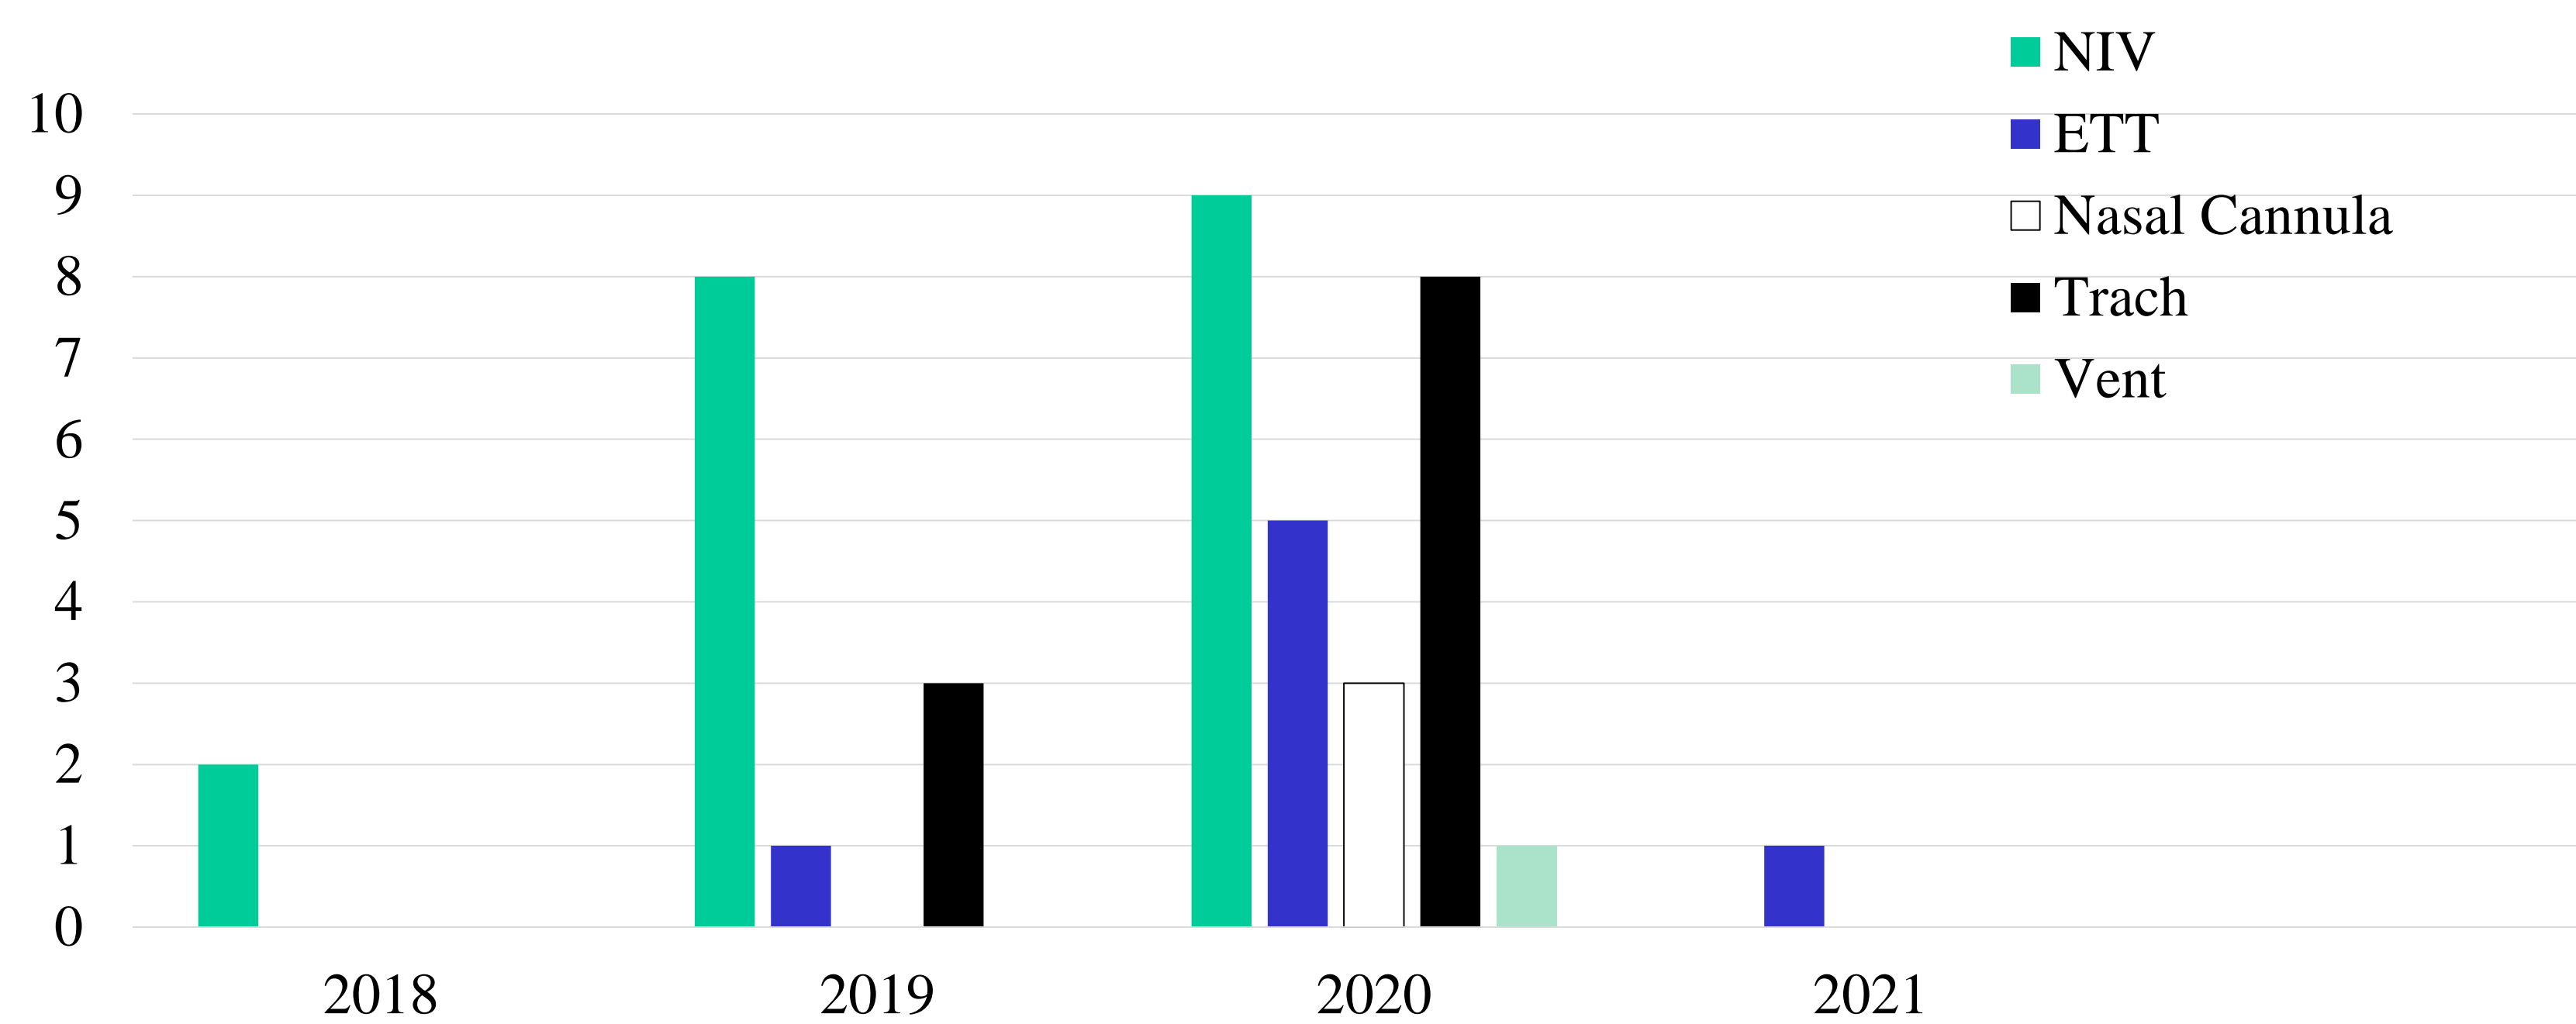

Graph 1: Displays number of pressure injuries according to device each year.

**RESULTS:** In 2018, we had 1 reported respiratory related DRPI that was stage 2. In 2019, there were 13 reported respiratory related DRPIs, 61.5% of these reported injuries occurred in Q3 and Q4 of 2019 which coincides with the PIPTF re-education efforts. In 2019, the number of reported respiratory related DRPIs in 2020 increased to 26 (66% increase when compared to 2019). In 2021 (1/1-4/30), there has been 1 reported respiratory related DRPI. A reduction in unstageable pressure injuries was also noted when comparing 2019 to 2020/2021. Contributing device and PI stage information for reported events is included in Table 1.

## Table 1

| Year     | Stage I | Stage II                  | Stage III        | Unstageable | Mucosal       | Skin Injury    | Deep Tissue Pressure Injury |
|----------|---------|---------------------------|------------------|-------------|---------------|----------------|-----------------------------|
| 2018(2)  |         | 2 NIV                     |                  |             |               |                |                             |
| 2019(12) | 3 NIV   | 2 NIV<br>2 Trach<br>1 ETT |                  | 3 NIV       |               | 1 Trach        |                             |
| 2020(26) | 1 NIV   | 6 NIV<br>6 trach<br>1 ETT | 1 trach<br>1 ETT |             | 2 NC<br>3 ETT | 1 NC<br>1 Vent | 2 NIV<br>2 Trach            |
| 2021 (1) |         |                           |                  |             | 1 ETT         |                |                             |

Table 1: Contributing device and PI stage information for reported events

**CONCLUSIONS:**A multi-disciplinary PIPTF can influence pressure injury prevention. While an increase in reportable DRPIs is not ideal on the surface, many of these injuries would have been unreported previously. The reduction in unstageable DRPIs could align with earlier detection of PIs and will be explored. Further studies must be done to evaluate the effectiveness of this model in other patient populations.

## References

- Barakat-Johnson, Michelle et al. “The incidence and prevalence of medical device-related pressure ulcers in intensive care: a systematic review.” *Journal of wound care* vol. 28,8 (2019): 512-521. doi:10.12968/jowc.2019.28.8.512
- Kayser, Susan A et al. “Prevalence and Analysis of Medical Device-Related Pressure Injuries: Results from the International Pressure Ulcer Prevalence Survey.” *Advances in skin & wound care* vol. 31,6 (2018): 276-285.

**BACKGROUND:** Pressure Injuries (PI) occur often in healthcare and cost billions of dollars annually in the U.S. Device-related PIs (DRPI) occur in up to 41% of hospital admissions.<sup>1</sup> Up to 35% of DRPIs are caused by respiratory equipment.<sup>2</sup> In our pediatric institution, we saw numerous respiratory related DRPIs that were not reported but required intervention. We aimed to increase early reporting of respiratory DRPIs.
